# Supplementary material
Source: PubMed Central journal article supplement (PMC6028011)
Supplement: NIHMS962476-supplement-1.pdf [file NIHMS962476-supplement-1.pdf]

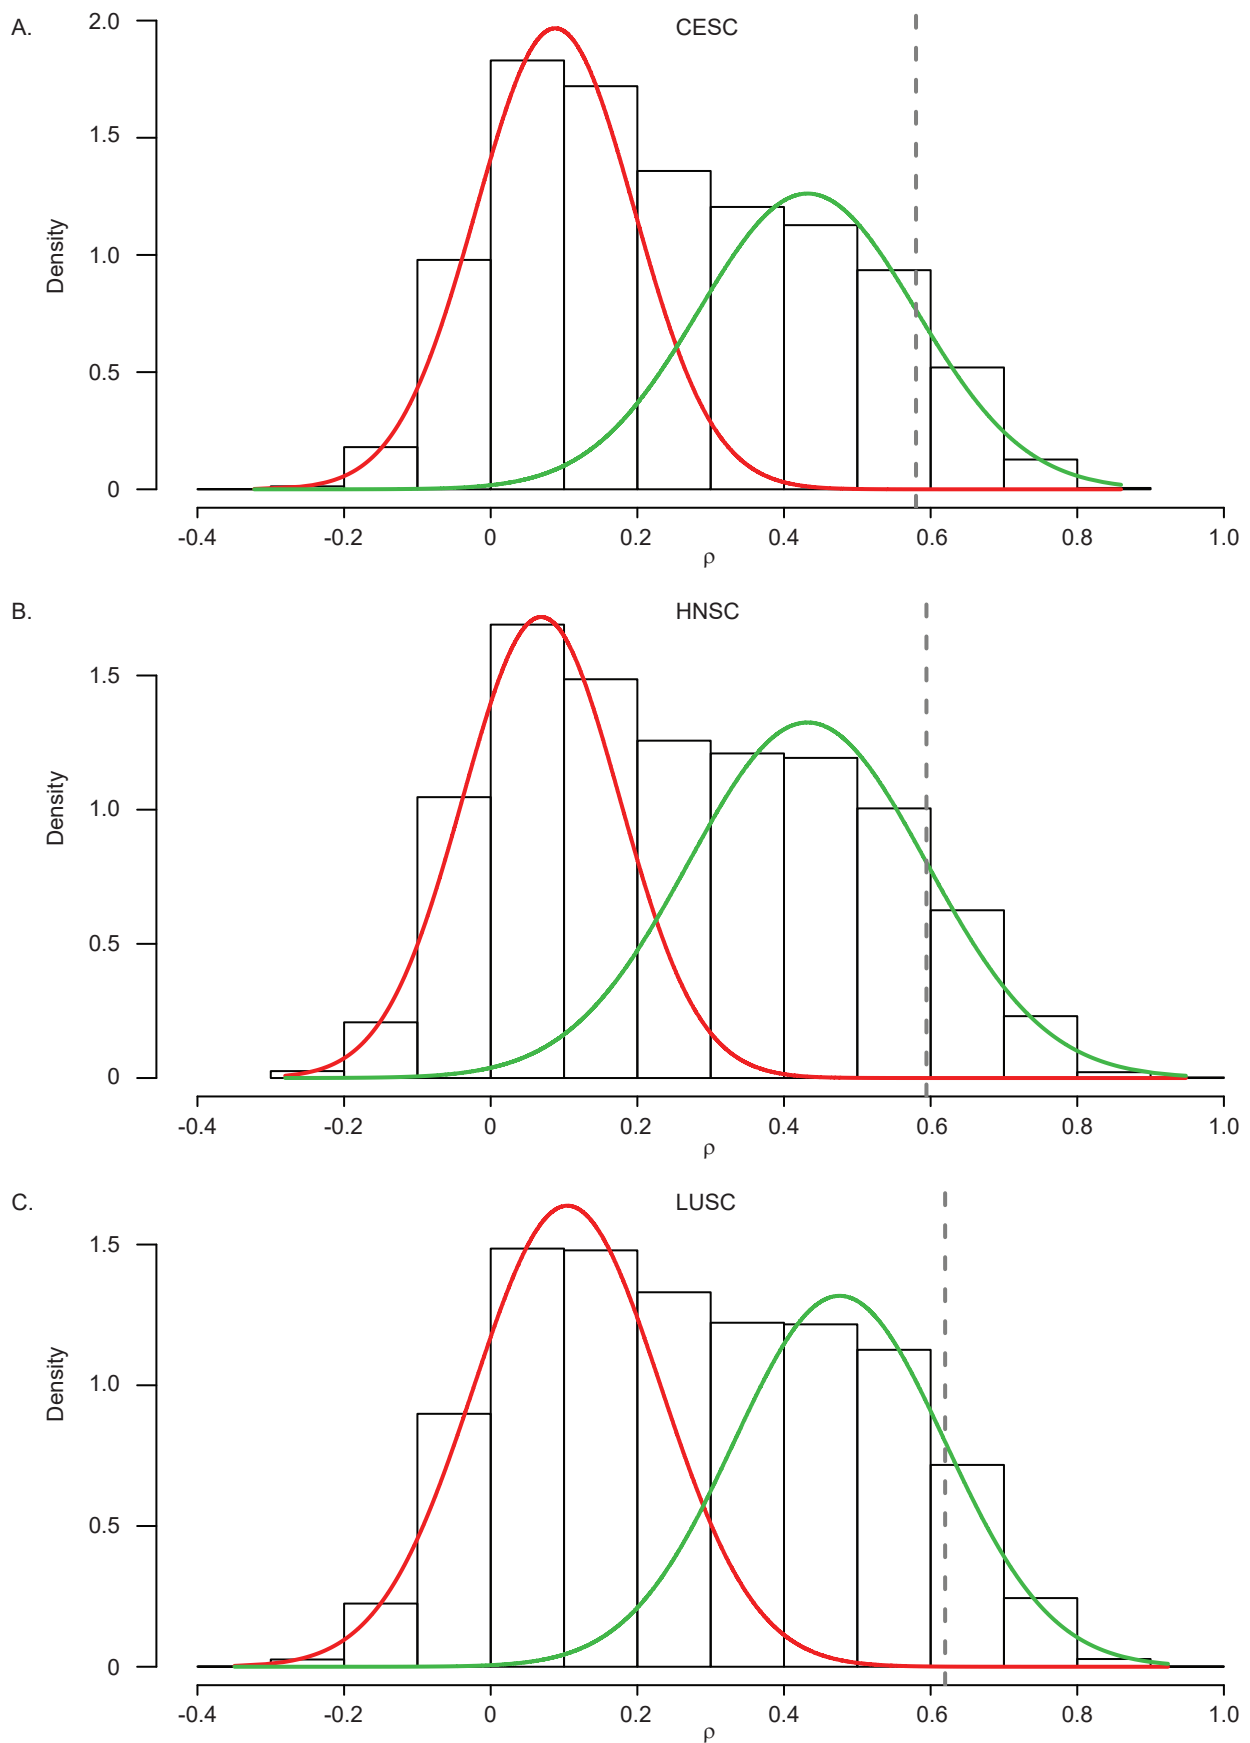

Supplementary Figure 1. Distributions of DNA copy number/gene expression Pearson correlation coefficients in three squamous tumors. Histograms of CN/GE correlations in CESC (A), HNSC (B), and LUSC (C) exhibit bimodal features. Density curves in each panel correspond to two normal distributions  $N(\mu_1, \sigma_1)$  and  $N(\mu_2, \sigma_2)$  using parameter estimates produced by the mixtools R package. Vertical dashed lines in each panel correspond to the value  $\mu_2 + \sigma_2$  in each tumor type.
