# Supplementary material
Source: PubMed Central journal article supplement (PMC6028011)
Supplement: NIHMS962476-supplement-2.pdf [file NIHMS962476-supplement-2.pdf]

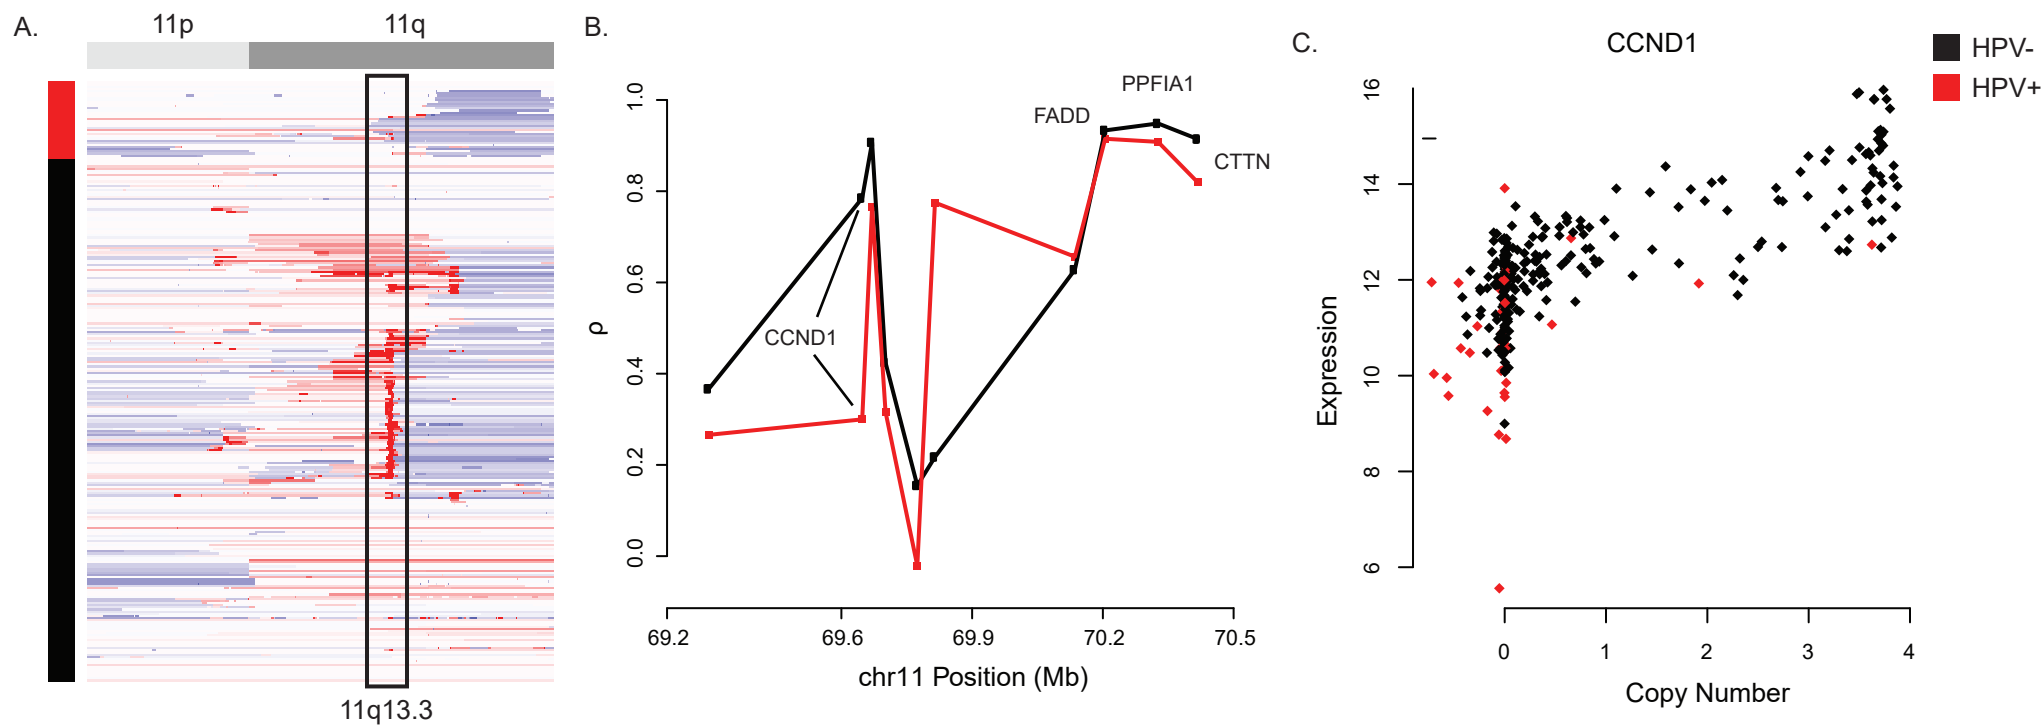

Supplementary Figure 2. Gene-level DNA copy number and gene expression in the 11q amplicon in head and neck squamous cell carcinoma by HPV status. (A) Heatmap display of gene-level quantitative DNA copy number measurements in chromosome 11. Genes are ordered by genomic position (columns); samples appear in rows and are hierarchically clustered according to HPV status. The rectangle highlights a select region containing driver genes with recurrent copy number changes. (B) Plot of unsmoothed gene-level correlations between gene expression and DNA copy number by HPV status for select genes in chromosome 11q13.3. (C) Scatterplots of quantitative measurements of DNA copy number and gene expression for CCND1 by HPV status.
