# Supplementary material
Source: PubMed Central journal article supplement (PMC6028011)
Supplement: NIHMS962476-supplement-3.pdf [file NIHMS962476-supplement-3.pdf]

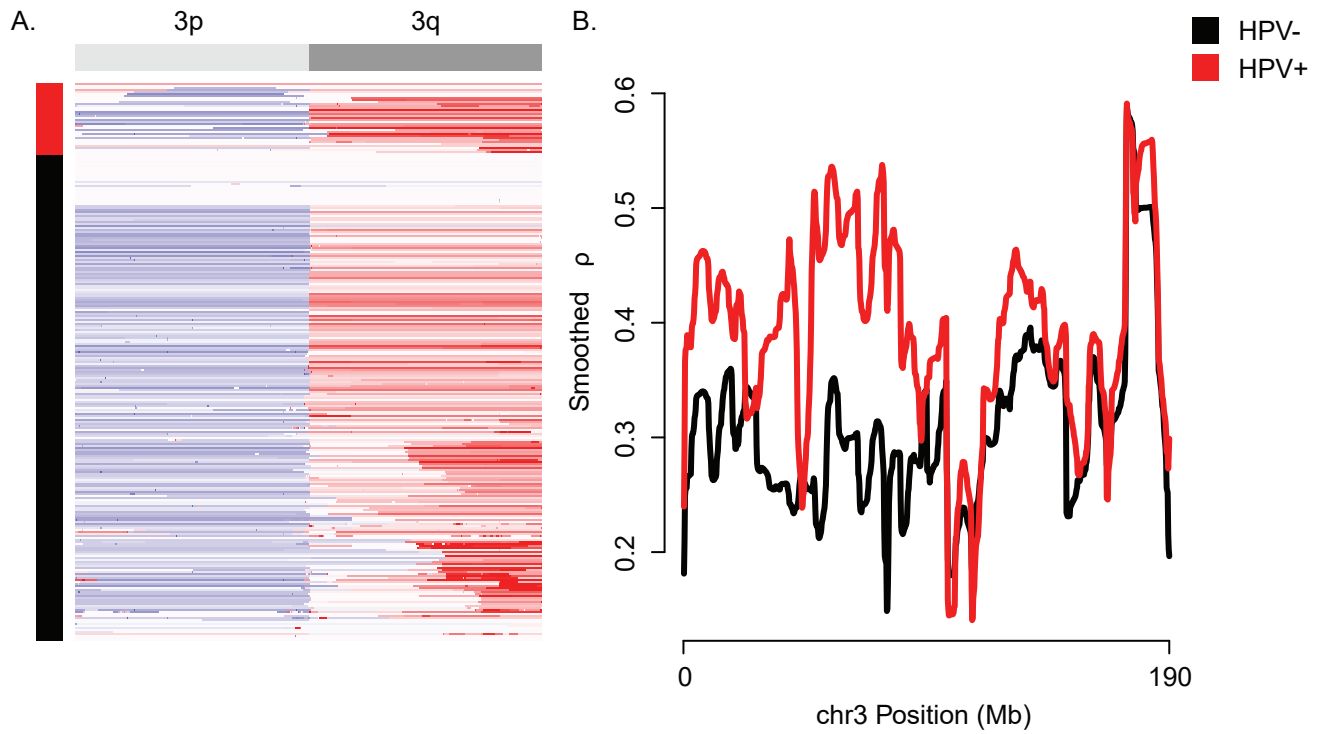

Supplementary Figure 3. Gene-level DNA copy number and gene expression in chromosome 3 in head and neck squamous cell carcinoma by HPV status. (A) Heatmap display of gene-level quantitative DNA copy number measurements in chromosome 3. Genes are ordered by genomic position (columns); samples appear in rows and are hierarchically clustered according to HPV status. (B) Plot of smoothed gene level correlations between gene expression and DNA copy number by HPV status.
