# Supplementary material
Source: PubMed Central journal article supplement (PMC6028011)
Supplement: NIHMS962476-supplement-4.pdf [file NIHMS962476-supplement-4.pdf]

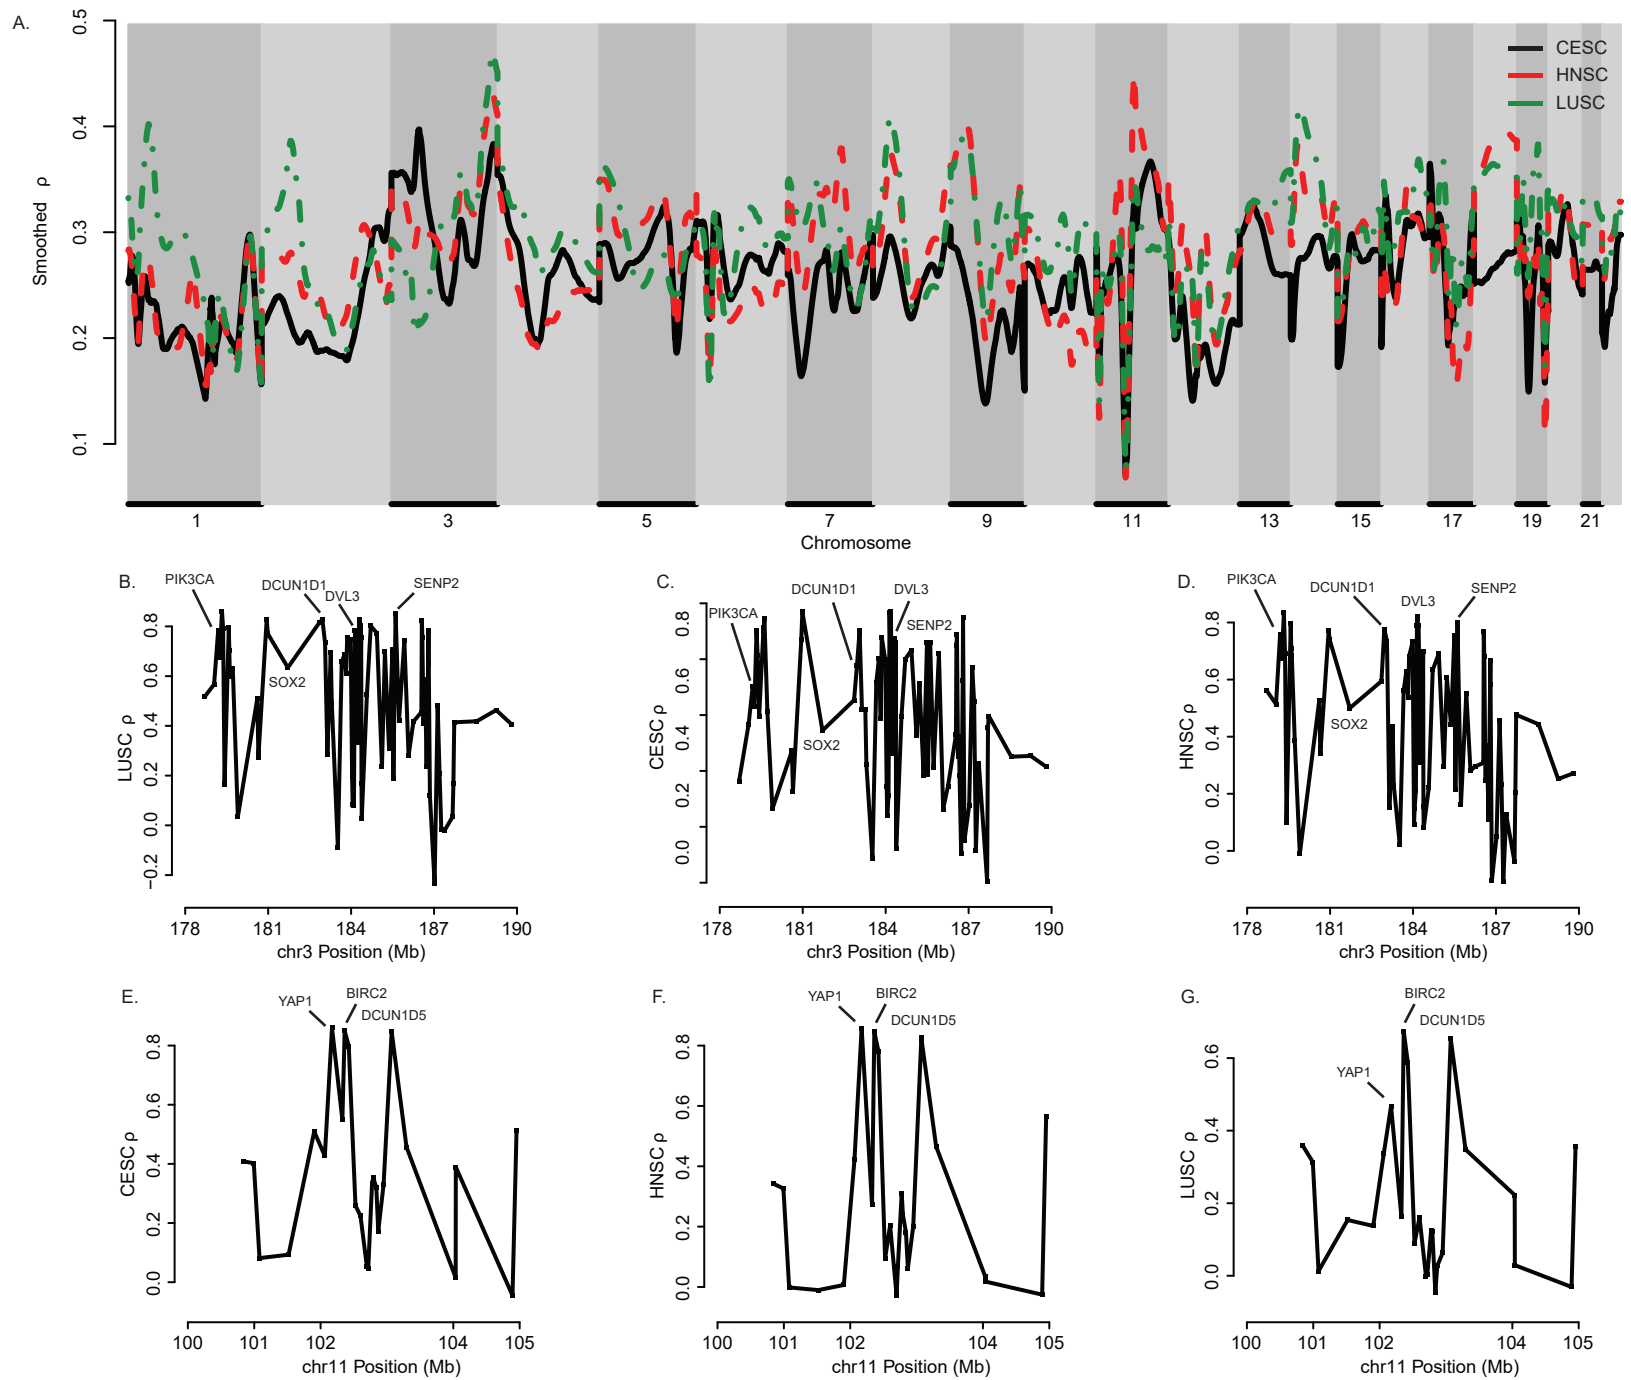

Supplementary Figure 4. Associations between gene expression and DNA copy number for three types of squamous tumors.

(A) Genome-wide plot of smoothed Pearson correlation coefficients from gene expression and quantitative measurements of DNA copy number for cervical squamous cell carcinoma (CESC), head and neck squamous cell carcinoma (HNSC), and lung squamous cell carcinoma (LUSC). (B – D) Plot of unsmoothed Pearson correlation coefficients from gene expression and DNA copy number for LUSC, CESC, and HNSC in the chromosome 3q amplicon. (E – G) Plot of unsmoothed Pearson correlation coefficients from gene expression and DNA copy number for CESC, HNSC, and LUSC in the chromosome 11q22.
