# Supplementary material
Source: PubMed Central journal article supplement (PMC6028011)
Supplement: NIHMS962476-supplement-5.pdf [file NIHMS962476-supplement-5.pdf]

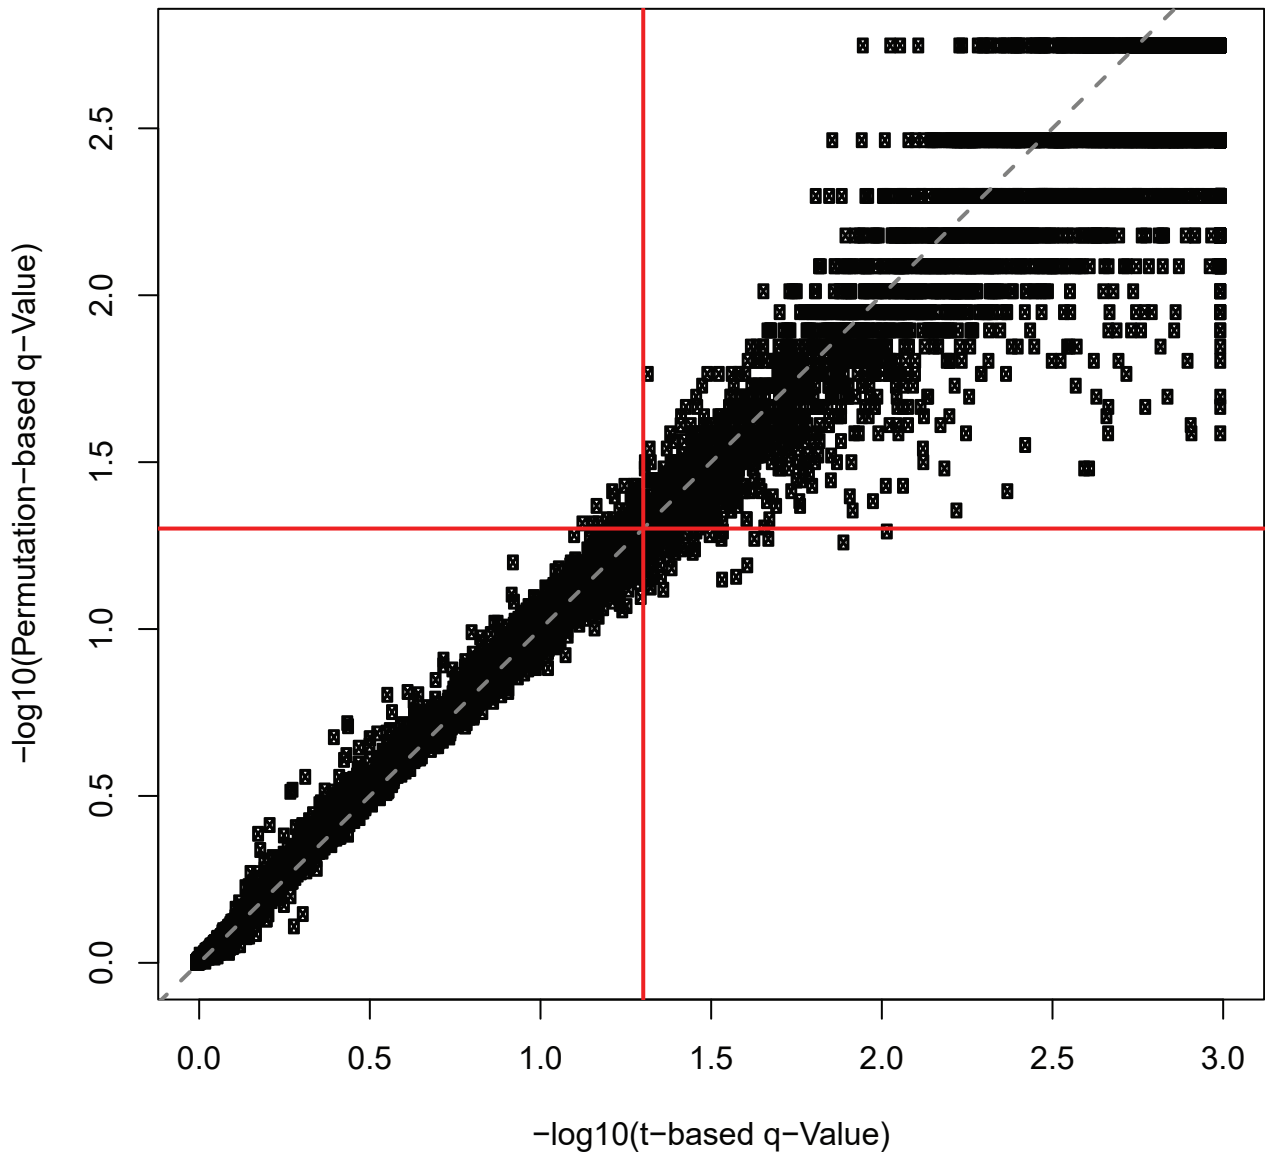

Supplementary Figure 5. Comparison of measures of statistical significance using the t-based and permutation-based methods. A scatterplot display of the  $-\log_{10}$ -transformed q-values from the t-based (x-axis) and permutation-based (y-axis) methods shows that the two methods produce highly concordant results. The dashed line represents  $y = x$ . Vertical and horizontal red lines are at  $-\log_{10}(0.05)$ . For visualization purposes, only x-values less than or equal to 3 are shown.
